# Supplementary figures and images for: The synthesis and photophysical properties of peripherally and non-peripherally substituted ball-type Mg(ii) and Zn(ii) phthalocyanines
Source: Royal Society of Chemistry journal article supplement (doi:10.1039/c0dt00920b), 2011-01-01

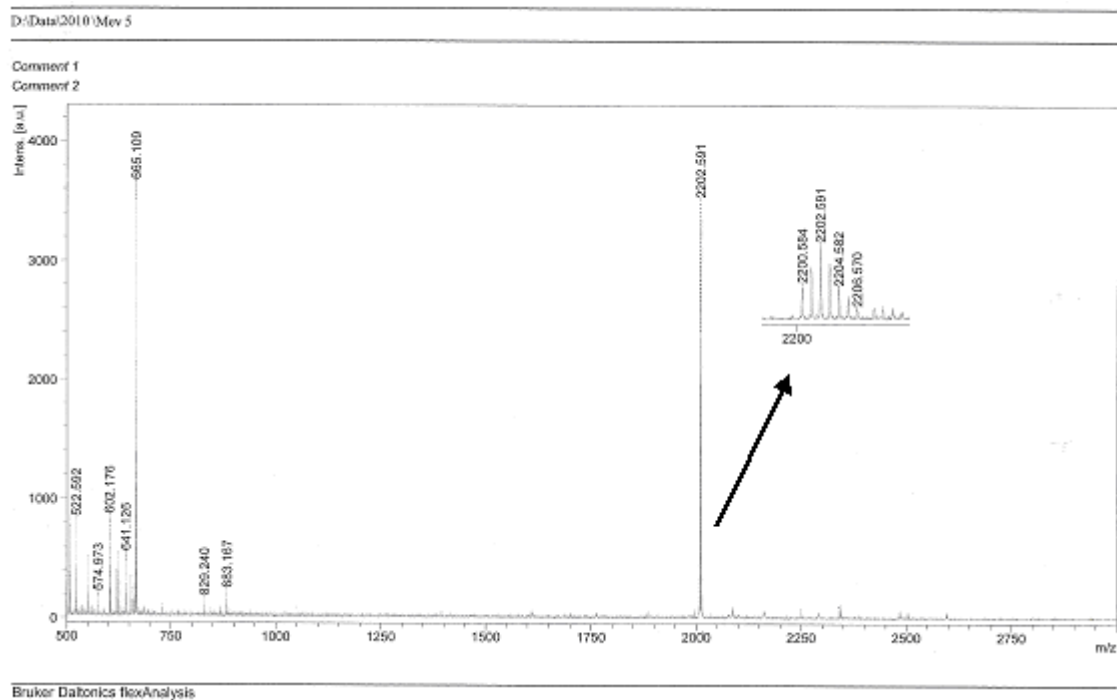

Fig. S1. Mass spectrum of complex 8

Supplement: c0dt00920b.pdf [file c0dt00920b.pdf]
